# Supplementary material for: Imported Malaria in Portugal: Prevalence of Polymorphisms in the Anti-Malarial Drug Resistance Genes pfmdr1 and pfk13
Source: MDPI journal article supplement (doi:10.3390/microorganisms9102045), 2021-09-28
Supplement: s1 [file s1]

**Table S1.** Primers and thermocycling conditions for PCR amplification of *pfmdr1* and *pfk13* gene fragments.

| Gene          | Primer   | Primer (5'-3')           | PCR conditions                                                                                |
|---------------|----------|--------------------------|-----------------------------------------------------------------------------------------------|
| <i>pfmdr1</i> | 86/184F  | ATGGGTAAAGAGCGAAAGAG     | 94 °C for 2 min; 10 × [94 °C for 1 min; 60 °C for 30 sec; 72°C for 1 min.]; 72 °C for 3 min.  |
|               | 86/184R  | GTCTTTTCTCCACAATAACTTGC  |                                                                                               |
|               | 86/184F2 | GTATGTGCTGTATTATCAGGAGGA |                                                                                               |
|               | 86/184F3 | AACAGTTCTTATTCCCATTAAGCC |                                                                                               |
|               | 1246F    | CTACAGCAATCGTTGGAGAA     |                                                                                               |
|               | 1246R    | GAGAATAGCTATAGCTAGAGC    |                                                                                               |
| <i>pfk13</i>  | k13F     | GAAATCCGTAACTATACCC      | 94 °C for 2 min; 10 × [94 °C for 1 min; 57 °C for 30 sec; 72 °C for 1 min.]; 72 °C for 3 min. |
|               | k13R     | GGAGTGACCAAATCTGGGA      |                                                                                               |
|               | 13NF2    | GAGATGTATGGTATGTTTCAAG   |                                                                                               |

Table S2. Molecular characterization of *P. falciparum* isolates.

|      | <i>pfmdr1</i> allele frequency |                   |                   |                   |                   |                   |                                                                   |
|------|--------------------------------|-------------------|-------------------|-------------------|-------------------|-------------------|-------------------------------------------------------------------|
|      | N86Y                           |                   | Y184F             |                   | D1246Y            |                   |                                                                   |
| Year | N<br><i>n</i> ; %              | Y<br><i>n</i> ; % | Y<br><i>n</i> ; % | F<br><i>n</i> ; % | D<br><i>n</i> ; % | Y<br><i>n</i> ; % | Haplotype<br><i>n</i> ; %                                         |
| 2014 | 6; 100                         | 0                 | 2; 40             | 3; 60             | 6; 100            | 0                 | NYD 2; 40<br>NFD 3; 60                                            |
| 2015 | 5; 83.3                        | 1; 16.7           | 3; 60             | 2; 40             | 6; 100            | 0                 | NYD 2; 40<br>NFD 2; 40<br>YYD 1; 20                               |
| 2016 | 4; 80                          | 1; 20             | 3; 60             | 2; 40             | 5; 100            | 0                 | NYD 3; 60<br>NFD 1; 20<br>YFD 1; 20                               |
| 2017 | 9; 90                          | 1; 10             | 9; 90             | 1; 10             | 12; 100           | 0                 | NYD 8; 80<br>NFD 1; 10<br>YYD 1; 10                               |
| 2018 | 27; 96.4                       | 1; 3.6            | 15; 62.5          | 9; 37.5           | 29; 100           | 0                 | NYD 15; 62.5<br>NFD 8; 33.3<br>YFD 1; 4.2                         |
| 2019 | 30; 90.9                       | 3; 9.1            | 24; 72.7          | 9; 27.3           | 32; 97            | 1; 3              | NYD 22; 66.7<br>NFD 7; 21.2<br>NFY 1; 3<br>YYD 2; 6.1<br>YFD 1; 3 |
| 2020 | 14; 93.3                       | 1; 6.7            | 10; 66.7          | 5; 33.3           | 18; 100           | 0                 | NYD 10; 66.7<br>NFD 4; 26.7<br>YFD 1; 6.6                         |
| 2021 | 6; 100                         | 0                 | 4; 80             | 1; 20             | 6; 100            | 0                 | NYD 4; 80<br>NFD 1; 20                                            |
